# Supplementary material for: A Comparison of the Whole Genome Approach of MeDIP-Seq to the Targeted Approach of the Infinium HumanMethylation450 BeadChip® for Methylome Profiling
Source: PLoS One. 2012 Nov 29;7(11):e50233. doi: 10.1371/journal.pone.0050233 (PMC3510246; doi:10.1371/journal.pone.0050233)
Supplement: Table S4 — Comparison of methylation levels between bisulfite sequencing, HumanMethylation 450K and MeDIP-seq data for GM01240 and GM01247 using an interval-based approach. The HGNC unique gene symbol for the gene associated with the CpG island being assayed is given. Two gene names separated by “/” indicate two genes share the island. “XY only” indicates that there are data for sample GM01247 only. “XX” only indicates that there are data for sample GM01240 only. The coordinates on the X chromosome (GRCh37) for each individual CpG analysed by bisulfite sequencing with the percentage methylation determined by MethTools analysis of the bisulfite sequencing data are given. For the bisulfite sequencing, the methylation levels for each individual CpG site assayed were classified as low, medium or high based on the output from MethTools with low, medium or high defined as: low (L), methylation level less than 20%; medium (M), methylation level greater than or equal to 20% and less than 70%) and high (H), methylation level greater than or equal to 70%. The bisulfite sequencing data were considered to be the gold standard. The exact values used for the boundaries for the HumanMethylation 450K and MEDIPs data were found iteratively by treating the bisulfite sequencing estimated methylation level as the “true” methylation level and comparing all possible combinations of boundaries programmatically to maximise the number of correctly classified overlapping CpG sites and minimise the number of incorrectly classified overlapping CpG sites between the two datasets. For the HumanMethylation 450K methylation levels were defined as low (L), average-beta value of less than 0.21; medium (M), average-beta value of greater than or equal to 0.21 and less than 0.57, and high (H), average-beta value of greater than or equal to 0.57. For MEDIPS, methylation levels were classified as low, medium or high defined as low (L), MEDIPS score of less than 280; medium (M), MEDIPS score of greater than or equal [file pone.0050233.s008.xlsx]

## Sheet: Sheet1
Table S4: Comparison of methylation levels between bisulfite sequencing, HumanMethylation450 and MeDIP-seq data for GM01240 and GM01247 using an interval-based approach.
GM01240								GM01247								GM01240							GM01247
Gene	BS coordinate	BS % methylation	BS methylation level	450K coordinate	450K probe name	450k average beta value	450K methylation level	Gene	BS coordinate	BS % methylation	BS methylation level	450K coordinate	450K probe name	450k average beta value	450K methylation level	Gene	BS coordinate	BS % methylation	BS methylation level	MeDIP-seq windows coords	MEDIPS score	MEDIPS methylation level	Gene	BS coordinate	BS % methylation	BS methylation level	MeDIP-seq windows coords	MEDIPS score	MEDIPS methylation level
PRPS2	X:12809315	40	M	X:12809315	cg26059639	0.42413	M	PRPS2	X:12809315	0	L	X:12809315	cg26059639	0.05929	L	PRPS2	X:12809315	40	M	X:12809101:12809400	295.091	M	PRPS2	X:12809315	0	L	X:12809101:12809400	129.553	L
PRPS2	X:12809326	29	M	X:12809326	cg19355911	0.38872	M	PRPS2	X:12809326	0	L	X:12809326	cg19355911	0.03946	L	PRPS2	X:12809326	29	M	X:12809101:12809400	295.091	M	PRPS2	X:12809326	0	L	X:12809101:12809400	129.553	L
PRPS2	X:12809328	40	M	X:12809328	cg01669374	0.2726	M	PRPS2	X:12809328	0	L	X:12809328	cg01669374	0.03758	L	PRPS2	X:12809328	40	M	X:12809101:12809400	295.091	M	PRPS2	X:12809328	0	L	X:12809101:12809400	129.553	L
PRPS2	X:12809345	22	M	X:12809345	cg21953876	0.35125	M	PRPS2	X:12809345	0	L	X:12809345	cg21953876	0.01872	L	PRPS2	X:12809345	22	M	X:12809101:12809400	295.091	M	PRPS2	X:12809345	0	L	X:12809101:12809400	129.553	L
PRPS2	X:12809548	37	M	X:12809548	cg05887304	0.29183	M	PRPS2	X:12809548	0	L	X:12809548	cg05887304	0.06319	L	PRPS2	X:12809548	37	M	X:12809401:12809700	298.937	M	PRPS2	X:12809548	0	L	X:12809401:12809700	169.667	L
PRPS2	X:12809608	40	M	X:12809608	cg20842040	0.413	M	PRPS2	X:12809608	0	L	X:12809608	cg20842040	0.05577	L	PRPS2	X:12809608	40	M	X:12809401:12809700	298.937	M	PRPS2	X:12809608	0	L	X:12809401:12809700	169.667	L
RAB9A	X:13707062	0	L	X:13707062	cg14621531	0.04501	L	RAB9A	X:13707062	0	L	X:13707062	cg14621531	0.02346	L	RAB9A	X:13707062	0	L	X:13707001:13707300	248.093	L	RAB9A	X:13707062	0	L	X:13707001:13707300	175.028	L
RAB9A	X:13707068	1	L	X:13707068	cg10430126	0.05422	L	RAB9A	X:13707068	0	L	X:13707068	cg10430126	0.05707	L	RAB9A	X:13707068	1	L	X:13707001:13707300	248.093	L	RAB9A	X:13707068	0	L	X:13707001:13707300	175.028	L
RAB9A	X:13707135	0	L	X:13707135	cg02723311	0.06139	L	RAB9A	X:13707135	0	L	X:13707135	cg02723311	0.07743	L	RAB9A	X:13707135	0	L	X:13707001:13707300	248.093	L	RAB9A	X:13707135	0	L	X:13707001:13707300	175.028	L
RAB9A	X:13707511	0	L	X:13707511	cg06407366	0.02131	L	RAB9A	X:13707511	0	L	X:13707511	cg06407366	0.01051	L	RAB9A	X:13707511	0	L	X:13707301:13707600	163.988	L	RAB9A	X:13707511	0	L	X:13707301:13707600	152.949	L
OFD1	X:13752442	0	L	X:13752442	cg24714666	0.06709	L	OFD1	X:13752442	0	L	X:13752442	cg24714666	0.0313	L	OFD1	X:13752442	0	L	X:13752301:13752600	225.563	L	OFD1	X:13752442	0	L	X:13752301:13752600	188.768	L
OFD1	X:13752670	0	L	X:13752670	cg21308826	0.04089	L	OFD1	X:13752670	0	L	X:13752670	cg21308826	0.03272	L	OFD1	X:13752670	0	L	X:13752601:13752900	192.286	L	OFD1	X:13752670	0	L	X:13752601:13752900	0	L
OFD1	X:13752687	0	L	X:13752687	cg19895492	0.06984	L	OFD1	X:13752687	0	L	X:13752687	cg19895492	0.09886	L	OFD1	X:13752687	0	L	X:13752601:13752900	192.286	L	OFD1	X:13752687	0	L	X:13752601:13752900	0	L
OFD1	X:13752698	0	L	X:13752698	cg04373587	0.20807	L	OFD1	X:13752698	0	L	X:13752698	cg04373587	0.19387	L	OFD1	X:13752698	0	L	X:13752601:13752900	192.286	L	OFD1	X:13752698	0	L	X:13752601:13752900	0	L
OFD1	X:13752760	0	L	X:13752760	cg18634060	0.0141	L	OFD1	X:13752760	0	L	X:13752760	cg18634060	0.01047	L	OFD1	X:13752760	0	L	X:13752601:13752900	192.286	L	OFD1	X:13752760	0	L	X:13752601:13752900	0	L
OFD1	X:13752813	0	L	X:13752813	cg17512860	0.06472	L	OFD1	X:13752813	1	L	X:13752813	cg17512860	0.05409	L	OFD1	X:13752813	0	L	X:13752601:13752900	192.286	L	OFD1	X:13752813	1	L	X:13752601:13752900	0	L
MOSPD2/FANCB	X:14891001	55	M	X:14891001	cg11648471	0.38455	M	OFD1 (XX only)										55	M	X:14890801:14891100	266.011	L
MOSPD2/FANCB	X:14891118	44	M	X:14891118	cg18426655	0.13684	L	MOSPD2/FANCB (XX only)										44	M	X:14891101:14891400	317.008	M
MOSPD2/FANCB	X:14891338	100	H	X:14891338	cg18132745	0.189	L	MOSPD2/FANCB	X:14891338	1	L	X:14891338	cg18132745	0.00522	L	MOSPD2/FANCB	X:14891338	100	H	X:14891101:14891400	317.008	M	MOSPD2/FANCB	X:14891338	1	L	X:14891101:14891400	172.523	L
MOSPD2/FANCB	X:14891340	82	H	X:14891340	cg08437835	0.13826	L	MOSPD2/FANCB	X:14891340	0	L	X:14891340	cg08437835	0.01437	L	MOSPD2/FANCB	X:14891340	82	H	X:14891101:14891400	317.008	M	MOSPD2/FANCB	X:14891340	0	L	X:14891101:14891400	172.523	L
MOSPD2/FANCB	X:14891349	100	H	X:14891349	cg07779434	0.26249	M	MOSPD2/FANCB	X:14891349	0	L	X:14891349	cg07779434	0.01533	L	MOSPD2/FANCB	X:14891349	100	H	X:14891101:14891400	317.008	M	MOSPD2/FANCB	X:14891349	0	L	X:14891101:14891400	172.523	L
MOSPD2/FANCB	X:14891416	100	H	X:14891416	cg11870452	0.23545	M	MOSPD2/FANCB	X:14891416	0	L	X:14891416	cg11870452	0.03964	L	MOSPD2/FANCB	X:14891416	100	H	X:14891401:14891700	320.608	M	MOSPD2/FANCB	X:14891416	0	L	X:14891401:14891700	147.435	L
MOSPD2/FANCB	X:14891423	55	M	X:14891423	cg08969352	0.39481	M	MOSPD2/FANCB	X:14891423	0	L	X:14891423	cg08969352	0.04411	L	MOSPD2/FANCB	X:14891423	55	M	X:14891401:14891700	320.608	M	MOSPD2/FANCB	X:14891423	0	L	X:14891401:14891700	147.435	L
MOSPD2/FANCB	X:14891453	63	M	X:14891453	cg25845992	0.25248	M	MOSPD2/FANCB	X:14891453	2	L	X:14891453	cg25845992	0.07281	L	MOSPD2/FANCB	X:14891453	63	M	X:14891401:14891700	320.608	M	MOSPD2/FANCB	X:14891453	2	L	X:14891401:14891700	147.435	L
MOSPD2/FANCB	X:14891591	81	H	X:14891591	cg19235109	0.29962	M	MOSPD2/FANCB	X:14891591	0	L	X:14891591	cg19235109	0.02797	L	MOSPD2/FANCB	X:14891591	81	H	X:14891401:14891700	320.608	M	MOSPD2/FANCB	X:14891591	0	L	X:14891401:14891700	147.435	L
MOSPD2/FANCB	X:14891601	75	H	X:14891601	cg15255859	0.26513	M	MOSPD2/FANCB	X:14891601	0	L	X:14891601	cg15255859	0.011	L	MOSPD2/FANCB	X:14891601	75	H	X:14891401:14891700	320.608	M	MOSPD2/FANCB	X:14891601	0	L	X:14891401:14891700	147.435	L
MOSPD2/FANCB	X:14891763	33	M	X:14891763	cg19740287	0.20975	L	MOSPD2/FANCB	X:14891763	0	L	X:14891763	cg19740287	0.04529	L	MOSPD2/FANCB	X:14891763	33	M	X:14891701:14892000	290.335	M	MOSPD2/FANCB	X:14891763	0	L	X:14891701:14892000	140.447	L
CA5B (F1) XY ONLY								MOSPD2/FANCB	X:15756052	4	L	X:15756052	cg02283106	0.06021	L	CA5B (F1) XY ONLY	X:15756052						CA5B (F1) XY ONLY	X:15756052	4	L	X:15756001:15756300	291.545	M
CA5B (F1) XY ONLY								CA5B (F1) XY ONLY	X:15756059	2	L	X:15756059	cg18391610	0.0377	L	CA5B (F1) XY ONLY	X:15756059						CA5B (F1) XY ONLY	X:15756059	2	L	X:15756001:15756300	291.545	M
CA5B (F1) XY ONLY								CA5B (F1) XY ONLY	X:15756062	0	L	X:15756062	cg22702707	0.01778	L	CA5B (F1) XY ONLY	X:15756062						CA5B (F1) XY ONLY	X:15756062	0	L	X:15756001:15756300	291.545	M
CA5B (F1) XY ONLY								CA5B (F1) XY ONLY	X:15756312	0	L	X:15756312	cg12386568	0.01689	L	CA5B (F1) XY ONLY	X:15756312						CA5B (F1) XY ONLY	X:15756312	0	L	X:15756301:15756600	276.576	L
CA5B (F1) XY ONLY								CA5B (F1) XY ONLY	X:15756372	0	L	X:15756372	cg00931201	0	L	CA5B (F1) XY ONLY	X:15756372						CA5B (F1) XY ONLY	X:15756372	0	L	X:15756301:15756600	276.576	L
CA5B (F1) XY ONLY								CA5B (F1) XY ONLY	X:15756384	0	L	X:15756384	cg18430208	0.00737	L	CA5B (F1) XY ONLY	X:15756384						CA5B (F1) XY ONLY	X:15756384	0	L	X:15756301:15756600	276.576	L
CA5B (F1) XY ONLY								CA5B (F1) XY ONLY	X:15756392	0	L	X:15756392	cg12978205	0.02023	L	CA5B (F1) XY ONLY	X:15756392						CA5B (F1) XY ONLY	X:15756392	0	L	X:15756301:15756600	276.576	L
CA5B (F1) XY ONLY								CA5B (F1) XY ONLY	X:15756407	0	L	X:15756407	cg25954223	0.01688	L	CA5B (F1) XY ONLY	X:15756407						CA5B (F1) XY ONLY	X:15756407	0	L	X:15756301:15756600	276.576	L
CA5B (F1) XY ONLY								CA5B (F1) XY ONLY	X:15756631	0	L	X:15756631	cg08195028	0.0287	L	CA5B (F1) XY ONLY	X:15756631						CA5B (F1) XY ONLY	X:15756631	0	L	X:15756601:15756900	202.719	L
SAT1	X:23801037	55	M	X:23801037	cg25413720	0.30848	M	SAT1	X:23801037	0	L	X:23801037	cg25413720	0.07599	L	SAT1	X:23801037	55	M	X:23800801:23801100	313.724	M	SAT1	X:23801037	0	L	X:23800801:23801100	270.861	L
SAT1	X:23801056	34	M	X:23801056	cg20308511	0.13128	L	SAT1	X:23801056	2	L	X:23801056	cg20308511	0.0281	L	SAT1	X:23801056	34	M	X:23800801:23801100	313.724	M	SAT1	X:23801056	2	L	X:23800801:23801100	270.861	L
SAT1	X:23801067	33	M	X:23801067	cg23530721	0.11865	L	SAT1	X:23801067	0	L	X:23801067	cg23530721	0.03379	L	SAT1	X:23801067	33	M	X:23800801:23801100	313.724	M	SAT1	X:23801067	0	L	X:23800801:23801100	270.861	L
SAT1	X:23801074	25	M	X:23801074	cg10308137	0.03416	L	SAT1	X:23801074	0	L	X:23801074	cg10308137	0.00623	L	SAT1	X:23801074	25	M	X:23800801:23801100	313.724	M	SAT1	X:23801074	0	L	X:23800801:23801100	270.861	L
SAT1	X:23801087	0	L	X:23801087	cg11395955	0.0429	L	SAT1	X:23801087	0	L	X:23801087	cg11395955	0	L	SAT1	X:23801087	0	L	X:23800801:23801100	313.724	M	SAT1	X:23801087	0	L	X:23800801:23801100	270.861	L
SAT1	X:23801244	62	M	X:23801244	cg17831869	0.3501	M	SAT1	X:23801244	0	L	X:23801244	cg17831869	0.01148	L	SAT1	X:23801244	62	M	X:23801101:23801400	307.246	M	SAT1	X:23801244	0	L	X:23801101:23801400	117.778	L
SAT1	X:23801333	43	M	X:23801333	cg12544391	0.40021	M	SAT1	X:23801333	0	L	X:23801333	cg12544391	0.00595	L	SAT1	X:23801333	43	M	X:23801101:23801400	307.246	M	SAT1	X:23801333	0	L	X:23801101:23801400	117.778	L
SAT1	X:23801440	62	M	X:23801440	cg09725439	0.33257	M	SAT1	X:23801440	0	L	X:23801440	cg09725439	0.05859	L	SAT1	X:23801440	62	M	X:23801401:23801700	328.319	M	SAT1	X:23801440	0	L	X:23801401:23801700	0	L
SAT1	X:23801624	66	M	X:23801624	cg13571540	0.26718	M	SAT1	X:23801624	0	L	X:23801624	cg13571540	0.04496	L	SAT1	X:23801624	66	M	X:23801401:23801700	328.319	M	SAT1	X:23801624	0	L	X:23801401:23801700	0	L
SAT1	X:23801656	41	M	X:23801656	cg14550383	0.32158	M	SAT1	X:23801656	0	L	X:23801656	cg14550383	0.08876	L	SAT1	X:23801656	41	M	X:23801401:23801700	328.319	M	SAT1	X:23801656	0	L	X:23801401:23801700	0	L
APOO/CXorf58	X:23925746	62	M	X:23925746	cg04924696	0.3721	M	APOO/CXorf58	X:23925746	0	L	X:23925746	cg04924696	0.07881	L	APOO/CXorf58	X:23925746	62	M	X:23925601:23925900	308.274	M	APOO/CXorf58	X:23925746	0	L	X:23925601:23925900	135.351	L
APOO/CXorf58	X:23925777	55	M	X:23925777	cg22881447	0.21464	M	APOO/CXorf58	X:23925777	2	L	X:23925777	cg22881447	0.06232	L	APOO/CXorf58	X:23925777	55	M	X:23925601:23925900	308.274	M	APOO/CXorf58	X:23925777	2	L	X:23925601:23925900	135.351	L
APOO/CXorf58	X:23925866	5	L	X:23925866	cg00627024	0.18049	L	APOO/CXorf58	X:23925866	0	L	X:23925866	cg00627024	0.05414	L	APOO/CXorf58	X:23925866	5	L	X:23925601:23925900	308.274	M	APOO/CXorf58	X:23925866	0	L	X:23925601:23925900	135.351	L
APOO/CXorf58	X:23925946	69	M	X:23925946	cg22412459	0.35599	M	APOO/CXorf58	X:23925946	0	L	X:23925946	cg22412459	0	L	APOO/CXorf58	X:23925946	69	M	X:23925901:23926200	324.022	M	APOO/CXorf58	X:23925946	0	L	X:23925901:23926200	0	L
APOO/CXorf58	X:23925992	72	H	X:23925992	cg19572135	0.32848	M	APOO/CXorf58	X:23925992	0	L	X:23925992	cg19572135	0.05207	L	APOO/CXorf58	X:23925992	72	H	X:23925901:23926200	324.022	M	APOO/CXorf58	X:23925992	0	L	X:23925901:23926200	0	L
APOO/CXorf58	X:23926007	65	M	X:23926007	cg26896756	0.17669	L	APOO/CXorf58	X:23926007	0	L	X:23926007	cg26896756	0.00143	L	APOO/CXorf58	X:23926007	65	M	X:23925901:23926200	324.022	M	APOO/CXorf58	X:23926007	0	L	X:23925901:23926200	0	L
APOO/CXorf58	X:23926023	78	H	X:23926023	cg17565795	0.28935	M	APOO/CXorf58	X:23926023	0	L	X:23926023	cg17565795	0.15655	L	APOO/CXorf58	X:23926023	78	H	X:23925901:23926200	324.022	M	APOO/CXorf58	X:23926023	0	L	X:23925901:23926200	0	L
APOO/CXorf58	X:23926049	38	M	X:23926049	cg15883201	0.22667	M	APOO/CXorf58	X:23926049	0	L	X:23926049	cg15883201	0.17001	L	APOO/CXorf58	X:23926049	38	M	X:23925901:23926200	324.022	M	APOO/CXorf58	X:23926049	0	L	X:23925901:23926200	0	L
APOO/CXorf58	X:23926141	74	H	X:23926141	cg05442715	0.16784	L	APOO/CXorf58	X:23926141	0	L	X:23926141	cg05442715	0	L	APOO/CXorf58	X:23926141	74	H	X:23925901:23926200	324.022	M	APOO/CXorf58	X:23926141	0	L	X:23925901:23926200	0	L
EIF2S3	X:24072640	0	L	X:24072640	cg09835024	0.05949	L	EIF2S3	X:24072640	0	L	X:24072640	cg09835024	0.02541	L	EIF2S3	X:24072640	0	L	X:24072601:24072900	184.301	L	EIF2S3	X:24072640	0	L	X:24072601:24072900	114.13	L
EIF2S3	X:24072811	0	L	X:24072811	cg00060882	0.13903	L	EIF2S3	X:24072811	0	L	X:24072811	cg00060882	0.10219	L	EIF2S3	X:24072811	0	L	X:24072601:24072900	184.301	L	EIF2S3	X:24072811	0	L	X:24072601:24072900	114.13	L
EIF2S3	X:24072865	0	L	X:24072865	cg27345735	0.15266	L	EIF2S3	X:24072865	0	L	X:24072865	cg27345735	0.14812	L	EIF2S3	X:24072865	0	L	X:24072601:24072900	184.301	L	EIF2S3	X:24072865	0	L	X:24072601:24072900	114.13	L
EIF2S3	X:24072887	0	L	X:24072887	cg12590845	0.09901	L	EIF2S3	X:24072887	0	L	X:24072887	cg12590845	0.04811	L	EIF2S3	X:24072887	0	L	X:24072601:24072900	184.301	L	EIF2S3	X:24072887	0	L	X:24072601:24072900	114.13	L
EIF2S3	X:24072962	0	L	X:24072962	cg06127902	0.15539	L	EIF2S3	X:24072962	0	L	X:24072962	cg06127902	0.13832	L	EIF2S3	X:24072962	0	L	X:24072901:24073200	207.477	L	EIF2S3	X:24072962	0	L	X:24072901:24073200	197	L
EIF2S3	X:24073090	0	L	X:24073090	cg16712639	0.22111	M	EIF2S3	X:24073090	3	L	X:24073090	cg16712639	0.22295	M	EIF2S3	X:24073090	0	L	X:24072901:24073200	207.477	L	EIF2S3	X:24073090	3	L	X:24072901:24073200	197	L
EIF2S3	X:24073134	0	L	X:24073134	cg25034591	0.09283	L	EIF2S3	X:24073134	0	L	X:24073134	cg25034591	0.04843	L	EIF2S3	X:24073134	0	L	X:24072901:24073200	207.477	L	EIF2S3	X:24073134	0	L	X:24072901:24073200	197	L
ZFX	X:24167334	0	L	X:24167334	cg00977690	0.03815	L	ZFX	X:24167334	1	L	X:24167334	cg00977690	0.03808	L	ZFX	X:24167334	0	L	X:24167101:24167400	174.431	L	ZFX	X:24167334	1	L	X:24167101:24167400	123.621	L
ZFX	X:24167821	0	L	X:24167821	cg06019215	0.05063	L	ZFX	X:24167821	0	L	X:24167821	cg06019215	0.04208	L	ZFX	X:24167821	0	L	X:24167701:24168000	0	L	ZFX	X:24167821	0	L	X:24167701:24168000	0	L
ZFX	X:24168618	0	L	X:24168618	cg15380114	0.0254	L	ZFX	X:24168618	0	L	X:24168618	cg15380114	0.02528	L	ZFX	X:24168618	0	L	X:24168601:24168900	80.8527	L	ZFX	X:24168618	0	L	X:24168601:24168900	0	L
ZFX	X:24168784	0	L	X:24168784	cg13653808	0.17539	L	ZFX	X:24168784	0	L	X:24168784	cg13653808	0.19169	L	ZFX	X:24168784	0	L	X:24168601:24168900	80.8527	L	ZFX	X:24168784	0	L	X:24168601:24168900	0	L
ZFX	X:24168810	0	L	X:24168810	cg03159836	0.03764	L	ZFX	X:24168810	0	L	X:24168810	cg03159836	0.03391	L	ZFX	X:24168810	0	L	X:24168601:24168900	80.8527	L	ZFX	X:24168810	0	L	X:24168601:24168900	0	L
POLA1	X:24711633	65	M	X:24711633	cg14520892	0.2867	M	POLA1	X:24711633	0	L	X:24711633	cg14520892	0.04095	L	POLA1	X:24711633	65	M	X:24711601:24711900	330.208	M	POLA1	X:24711633	0	L	X:24711601:24711900	196.136	L
POLA1	X:24711703	54	M	X:24711703	cg17865482	0.12635	L	POLA1	X:24711703	0	L	X:24711703	cg17865482	0.02981	L	POLA1	X:24711703	54	M	X:24711601:24711900	330.208	M	POLA1	X:24711703	0	L	X:24711601:24711900	196.136	L
POLA1	X:24711899	26	M	X:24711899	cg26064831	0.19692	L	POLA1	X:24711899	0	L	X:24711899	cg26064831	0.0399	L	POLA1	X:24711899	26	M	X:24711601:24711900	330.208	M	POLA1	X:24711899	0	L	X:24711601:24711900	196.136	L
POLA1	X:24711994	27	M	X:24711994	cg06079963	0.34081	M	POLA1	X:24711994	0	L	X:24711994	cg06079963	0.01975	L	POLA1	X:24711994	27	M	X:24711901:24712200	330.308	M	POLA1	X:24711994	0	L	X:24711901:24712200	202.517	L
POLA1	X:24712096	63	M	X:24712096	cg23503517	0.33049	M	POLA1	X:24712096	0	L	X:24712096	cg23503517	0.00293	L	POLA1	X:24712096	63	M	X:24711901:24712200	330.308	M	POLA1	X:24712096	0	L	X:24711901:24712200	202.517	L
POLA1	X:24712207	45	M	X:24712207	cg03266942	0.16207	L	POLA1	X:24712207	0	L	X:24712207	cg03266942	0.06598	L	POLA1	X:24712207	45	M	X:24712201:24712500	334.238	M	POLA1	X:24712207	0	L	X:24712201:24712500	207.929	L
ATP6AP2	X:40439740	35	M	X:40439740	cg11014998	0.29071	M	ATP6AP2	X:40439740	0	L	X:40439740	cg11014998	0.14528	L	ATP6AP2	X:40439740	35	M	X:40439701:40440000	321.71	M	ATP6AP2	X:40439740	0	L	X:40439701:40440000	193.514	L
ATP6AP2	X:40439842	53	M	X:40439842	cg18274682	0.13197	L	ATP6AP2	X:40439842	0	L	X:40439842	cg18274682	0.03132	L	ATP6AP2	X:40439842	53	M	X:40439701:40440000	321.71	M	ATP6AP2	X:40439842	0	L	X:40439701:40440000	193.514	L
ATP6AP2	X:40439984	48	M	X:40439984	cg18679504	0.13008	L	ATP6AP2	X:40439984	0	L	X:40439984	cg18679504	0	L	ATP6AP2	X:40439984	48	M	X:40439701:40440000	321.71	M	ATP6AP2	X:40439984	0	L	X:40439701:40440000	193.514	L
ATP6AP2	X:40440021	52	M	X:40440021	cg18105467	0.15796	L	ATP6AP2	X:40440021	0	L	X:40440021	cg18105467	0.01928	L	ATP6AP2	X:40440021	52	M	X:40440001:40440300	313.067	M	ATP6AP2	X:40440021	0	L	X:40440001:40440300	186.252	L
ATP6AP2	X:40440170	52	M	X:40440170	cg10347293	0.21904	M	ATP6AP2	X:40440170	5	L	X:40440170	cg10347293	0	L	ATP6AP2	X:40440170	52	M	X:40440001:40440300	313.067	M	ATP6AP2	X:40440170	5	L	X:40440001:40440300	186.252	L
ATP6AP2	X:40440191	48	M	X:40440191	cg07381502	0.21082	M	ATP6AP2	X:40440191	0	L	X:40440191	cg07381502	0.00082	L	ATP6AP2	X:40440191	48	M	X:40440001:40440300	313.067	M	ATP6AP2	X:40440191	0	L	X:40440001:40440300	186.252	L
ATP6AP2	X:40440209	47	M	X:40440209	cg20887366	0.27222	M	ATP6AP2	X:40440209	0	L	X:40440209	cg20887366	0.08269	L	ATP6AP2	X:40440209	47	M	X:40440001:40440300	313.067	M	ATP6AP2	X:40440209	0	L	X:40440001:40440300	186.252	L
CXorf38	X:40506749	0	L	X:40506749	cg18364820	0.06705	L	CXorf38 (XX only)										0	L	X:40506601:40506900	177.415	L
CXorf38	X:40506804	0	L	X:40506804	cg15322570	0.06203	L	CXorf38 (XX only)										0	L	X:40506601:40506900	177.415	L
CXorf38	X:40506821	0	L	X:40506821	cg17041400	0.00584	L	CXorf38 (XX only)										0	L	X:40506601:40506900	177.415	L
CXorf38	X:40506829	0	L	X:40506829	cg20137045	0	L	CXorf38 (XX only)										0	L	X:40506601:40506900	177.415	L
CXorf38	X:40506945	0	L	X:40506945	cg16371488	0	L	CXorf38 (XX only)										0	L	X:40506901:40507200	203.383	L
CXorf38	X:40506974	0	L	X:40506974	cg22148243	0.04114	L	CXorf38 (XX only)										0	L	X:40506901:40507200	203.383	L
CXorf38	X:40506981	0	L	X:40506981	cg03169432	0.03815	L	CXorf38 (XX only)										0	L	X:40506901:40507200	203.383	L
MED14	X:40595074	0	L	X:40595074	cg20332242	0.08119	L	MED14	X:40595074	0	L	X:40595074	cg20332242	0.06613	L	MED14	X:40595074	0	L	X:40594801:40595100	122.273	L	MED14	X:40595074	0	L	X:40594801:40595100	0	L
MED14	X:40595117	1	L	X:40595117	cg27522270	0.00314	L	MED14	X:40595117	0	L	X:40595117	cg27522270	0	L	MED14	X:40595117	1	L	X:40595101:40595400	153.201	L	MED14	X:40595117	0	L	X:40595101:40595400	0	L
MED14	X:40595209	0	L	X:40595209	cg06309256	0.00823	L	MED14	X:40595209	1	L	X:40595209	cg06309256	0	L	MED14	X:40595209	0	L	X:40595101:40595400	153.201	L	MED14	X:40595209	1	L	X:40595101:40595400	0	L
KDM5C	X:53254027	2	L	X:53254027	cg04927657	0.06216	L	KDM5C	X:53254027	0	L	X:53254027	cg04927657	0.05413	L	KDM5C	X:53254027	2	L	X:53253901:53254200	215.355	L	KDM5C	X:53254027	0	L	X:53253901:53254200	189.344	L
KDM5C	X:53254132	0	L	X:53254132	cg09554224	0.10114	L	KDM5C	X:53254132	0	L	X:53254132	cg09554224	0.08185	L	KDM5C	X:53254132	0	L	X:53253901:53254200	215.355	L	KDM5C	X:53254132	0	L	X:53253901:53254200	189.344	L
KDM5C	X:53254643	0	L	X:53254643	cg16824069	0.01117	L	KDM5C (XX only)										0	L	X:53254501:53254800	139.473	L
KDM5C	X:53254653	0	L	X:53254653	cg04927982	0	L	KDM5C (XX only)										0	L	X:53254501:53254800	139.473	L
KDM5C	X:53254678	0	L	X:53254678	cg19903753	0	L	KDM5C (XX only)										0	L	X:53254501:53254800	139.473	L
KDM5C	X:53254711	0	L	X:53254711	cg16417926	0.01031	L	KDM5C (XX only)										0	L	X:53254501:53254800	139.473	L
KDM5C	X:53254742	0	L	X:53254742	cg27526317	0.02315	L	KDM5C (XX only)										0	L	X:53254501:53254800	139.473	L
KDM5C	X:53254760	0	L	X:53254760	cg12234996	0.00239	L	KDM5C (XX only)										0	L	X:53254501:53254800	139.473	L
KDM5C	X:53254818	0	L	X:53254818	cg01859586	0.11942	L	KDM5C (XX only)										0	L	X:53254801:53255100	285.792	M
FOXO4	X:70316254	19	L	X:70316254	cg24522076	0.28295	M	FOXO4	X:70316254	0	L	X:70316254	cg24522076	0.02996	L	FOXO4	X:70316254	19	L	X:70316101:70316400	350.42	M	FOXO4	X:70316254	0	L	X:70316101:70316400	246.827	L
FOXO4	X:70316444	25	M	X:70316444	cg18288715	0.35067	M	FOXO4	X:70316444	0	L	X:70316444	cg18288715	0.02047	L	FOXO4	X:70316444	25	M	X:70316401:70316700	345.031	M	FOXO4	X:70316444	0	L	X:70316401:70316700	190.823	L
FOXO4	X:70316667	2	L	X:70316667	cg27523218	0.07412	L	FOXO4	X:70316667	0	L	X:70316667	cg27523218	0.0684	L	FOXO4	X:70316667	2	L	X:70316401:70316700	345.031	M	FOXO4	X:70316667	0	L	X:70316401:70316700	190.823	L
FOXO4	X:70316670	22	M	X:70316670	cg21166191	0.19116	L	FOXO4	X:70316670	0	L	X:70316670	cg21166191	0.06194	L	FOXO4	X:70316670	22	M	X:70316401:70316700	345.031	M	FOXO4	X:70316670	0	L	X:70316401:70316700	190.823	L
ACRC	X:70797868	89	H	X:70797868	cg25275876	0.782	H	ACRC	X:70797868	100	H	X:70797868	cg25275876	0.86442	H	ACRC	X:70797868	89	H	X:70797601:70797900	380.939	M	ACRC	X:70797868	100	H	X:70797601:70797900	322.397	M
ACRC	X:70798047	81	H	X:70798047	cg10104771	0.8563	H	ACRC	X:70798047	100	H	X:70798047	cg10104771	0.95851	H	ACRC	X:70798047	81	H	X:70797901:70798200	404.961	M	ACRC	X:70798047	100	H	X:70797901:70798200	339.394	M
ACRC	X:70798158	97	H	X:70798158	cg09213780	0.90173	H	ACRC	X:70798158	100	H	X:70798158	cg09213780	0.91921	H	ACRC	X:70798158	97	H	X:70797901:70798200	404.961	M	ACRC	X:70798158	100	H	X:70797901:70798200	339.394	M
ACRC	X:70798346	95	H	X:70798346	cg16628997	0.9227	H	ACRC	X:70798346	100	H	X:70798346	cg16628997	0.90663	H	ACRC	X:70798346	95	H	X:70798201:70798500	398.933	M	ACRC	X:70798346	100	H	X:70798201:70798500	332.394	M
ERCC6L/PIN4	X:71458680	0	L	X:71458680	cg01004805	0.07582	L	ERCC6L/PIN4	X:71458680	0	L	X:71458680	cg01004805	0.03453	L	ERCC6L/PIN4	X:71458680	0	L	X:71458501:71458800	305.965	M	ERCC6L/PIN4	X:71458680	0	L	X:71458501:71458800	141.349	L
ERCC6L/PIN4	X:71458789	44	M	X:71458789	cg12747864	0.3289	M	ERCC6L/PIN4	X:71458789	0	L	X:71458789	cg12747864	0.11729	L	ERCC6L/PIN4	X:71458789	44	M	X:71458501:71458800	305.965	M	ERCC6L/PIN4	X:71458789	0	L	X:71458501:71458800	141.349	L
ERCC6L/PIN4	X:71458866	15	L	X:71458866	cg16118600	0.1427	L	ERCC6L/PIN4	X:71458866	0	L	X:71458866	cg16118600	0.06564	L	ERCC6L/PIN4	X:71458866	15	L	X:71458801:71459100	326.891	M	ERCC6L/PIN4	X:71458866	0	L	X:71458801:71459100	194.03	L
ERCC6L/PIN4	X:71458871	25	M	X:71458871	cg09743261	0.27072	M	ERCC6L/PIN4	X:71458871	0	L	X:71458871	cg09743261	0.07925	L	ERCC6L/PIN4	X:71458871	25	M	X:71458801:71459100	326.891	M	ERCC6L/PIN4	X:71458871	0	L	X:71458801:71459100	194.03	L
ERCC6L/PIN4	X:71459005	46	M	X:71459005	cg24671250	0.30779	M	ERCC6L/PIN4	X:71459005	0	L	X:71459005	cg24671250	0.0968	L	ERCC6L/PIN4	X:71459005	46	M	X:71458801:71459100	326.891	M	ERCC6L/PIN4	X:71459005	0	L	X:71458801:71459100	194.03	L
ERCC6L/PIN4	X:71459039	4	L	X:71459039	cg07056550	0.25824	M	ERCC6L/PIN4	X:71459039	0	L	X:71459039	cg07056550	0.05062	L	ERCC6L/PIN4	X:71459039	4	L	X:71458801:71459100	326.891	M	ERCC6L/PIN4	X:71459039	0	L	X:71458801:71459100	194.03	L
ERCC6L/PIN4	X:71459071	17	L	X:71459071	cg05872222	0.11956	L	ERCC6L/PIN4	X:71459071	0	L	X:71459071	cg05872222	0.02907	L	ERCC6L/PIN4	X:71459071	17	L	X:71458801:71459100	326.891	M	ERCC6L/PIN4	X:71459071	0	L	X:71458801:71459100	194.03	L
ERCC6L/PIN4	X:71459111	44	M	X:71459111	cg25402895	0.33777	M	ERCC6L/PIN4	X:71459111	0	L	X:71459111	cg25402895	0.02218	L	ERCC6L/PIN4	X:71459111	44	M	X:71459101:71459400	366.983	M	ERCC6L/PIN4	X:71459111	0	L	X:71459101:71459400	296.469	M
ERCC6L/PIN4	X:71459115	38	M	X:71459115	cg05279113	0.28606	M	ERCC6L/PIN4	X:71459115	0	L	X:71459115	cg05279113	0.04217	L	ERCC6L/PIN4	X:71459115	38	M	X:71459101:71459400	366.983	M	ERCC6L/PIN4	X:71459115	0	L	X:71459101:71459400	296.469	M
ERCC6L/PIN4	X:71459119	38	M	X:71459119	cg12689022	0.33106	M	ERCC6L/PIN4	X:71459119	0	L	X:71459119	cg12689022	0.04528	L	ERCC6L/PIN4	X:71459119	38	M	X:71459101:71459400	366.983	M	ERCC6L/PIN4	X:71459119	0	L	X:71459101:71459400	296.469	M
ERCC6L/PIN4	X:71459274	22	M	X:71459274	cg08304428	0.47211	M	ERCC6L/PIN4	X:71459274	66	M	X:71459274	cg08304428	0.56364	M	ERCC6L/PIN4	X:71459274	22	M	X:71459101:71459400	366.983	M	ERCC6L/PIN4	X:71459274	66	H	X:71459101:71459400	296.469	M
RPS4X	X:71496641	5	L	X:71496641	cg06868150	0.06194	L	RPS4X	X:71496641	0	L	X:71496641	cg06868150	0.06515	L	RPS4X	X:71496641	5	L	X:71496601:71496900	225.985	L	RPS4X	X:71496641	0	L	X:71496601:71496900	125.799	L
RPS4X	X:71496665	13	L	X:71496665	cg25869832	0.07059	L	RPS4X	X:71496665	0	L	X:71496665	cg25869832	0.03809	L	RPS4X	X:71496665	13	L	X:71496601:71496900	225.985	L	RPS4X	X:71496665	0	L	X:71496601:71496900	125.799	L
RPS4X	X:71496701	26	M	X:71496701	cg01714671	0.1077	L	RPS4X	X:71496701	0	L	X:71496701	cg01714671	0.05517	L	RPS4X	X:71496701	26	M	X:71496601:71496900	225.985	L	RPS4X	X:71496701	0	L	X:71496601:71496900	125.799	L
RPS4X	X:71497035	8	L	X:71497035	cg08859156	0.00584	L	RPS4X	X:71497035	0	L	X:71497035	cg08859156	0.01041	L	RPS4X	X:71497035	8	L	X:71496901:71497200	182.255	L	RPS4X	X:71497035	0	L	X:71496901:71497200	160.799	L
RPS4X	X:71497113	2	L	X:71497113	cg16313903	0.06444	L	RPS4X	X:71497113	0	L	X:71497113	cg16313903	0	L	RPS4X	X:71497113	2	L	X:71496901:71497200	182.255	L	RPS4X	X:71497113	0	L	X:71496901:71497200	160.799	L
RPS4X	X:71497221	30	M	X:71497221	cg20882246	0.08988	L	RPS4X	X:71497221	0	L	X:71497221	cg20882246	0.04986	L	RPS4X	X:71497221	30	M	X:71497201:71497500	244.686	L	RPS4X	X:71497221	0	L	X:71497201:71497500	253.82	L
RPS4X	X:71497224	0	L	X:71497224	cg02546818	0.03986	L	RPS4X	X:71497224	0	L	X:71497224	cg02546818	0.04629	L	RPS4X	X:71497224	0	L	X:71497201:71497500	244.686	L	RPS4X	X:71497224	0	L	X:71497201:71497500	253.82	L
DIAPH2	X:95939631	0	L	X:95939631	cg17694877	0.13705	L	DIAPH2	X:95939631	0	L	X:95939631	cg17694877	0.07009	L	DIAPH2	X:95939631	0	L	X:95939401:95939700	262.391	L	DIAPH2	X:95939631	0	L	X:95939401:95939700	0	L
DIAPH2	X:95939710	2	L	X:95939710	cg07917796	0.20026	L	DIAPH2	X:95939710	0	L	X:95939710	cg07917796	0.09113	L	DIAPH2	X:95939710	2	L	X:95939701:95940000	208.878	L	DIAPH2	X:95939710	0	L	X:95939701:95940000	102.378	L
DIAPH2	X:95939848	0	L	X:95939848	cg02875834	0.05925	L	DIAPH2	X:95939848	0	L	X:95939848	cg02875834	0.00835	L	DIAPH2	X:95939848	0	L	X:95939701:95940000	208.878	L	DIAPH2	X:95939848	0	L	X:95939701:95940000	102.378	L
DIAPH2	X:95939864	24	M	X:95939864	cg12152167	0.14419	L	DIAPH2	X:95939864	0	L	X:95939864	cg12152167	0.02227	L	DIAPH2	X:95939864	24	M	X:95939701:95940000	208.878	L	DIAPH2	X:95939864	0	L	X:95939701:95940000	102.378	L
DIAPH2	X:95940102	50	M	X:95940102	cg09146129	0.08705	L	DIAPH2	X:95940102	0	L	X:95940102	cg09146129	0.12065	L	DIAPH2	X:95940102	50	M	X:95940001:95940300	238.284	L	DIAPH2	X:95940102	0	L	X:95940001:95940300	142.333	L
DIAPH2	X:95940153	28	M	X:95940153	cg05699139	0.21847	M	DIAPH2	X:95940153	0	L	X:95940153	cg05699139	0.06318	L	DIAPH2	X:95940153	28	M	X:95940001:95940300	238.284	L	DIAPH2	X:95940153	0	L	X:95940001:95940300	142.333	L
DIAPH2	X:95940170	7	L	X:95940170	cg10999701	0.05341	L	DIAPH2	X:95940170	0	L	X:95940170	cg10999701	0.01165	L	DIAPH2	X:95940170	7	L	X:95940001:95940300	238.284	L	DIAPH2	X:95940170	0	L	X:95940001:95940300	142.333	L
SYTL4	X:99986436	48	M	X:99986436	cg27260927	0.51674	M	SYTL4	X:99986436	46	M	X:99986436	cg27260927	0.46399	M	SYTL4	X:99986436	48	M	X:99986401:99986700	359.945	M	SYTL4	X:99986436	46	M	X:99986401:99986700	246.635	L
SYTL4	X:99986547	7	L	X:99986547	cg12382941	0.09483	L	SYTL4	X:99986547	0	L	X:99986547	cg12382941	0.05093	L	SYTL4	X:99986547	7	L	X:99986401:99986700	359.945	M	SYTL4	X:99986547	0	L	X:99986401:99986700	246.635	L
SYTL4	X:99986558	0	L	X:99986558	cg21945991	0.02819	L	SYTL4	X:99986558	3	L	X:99986558	cg21945991	0.02047	L	SYTL4	X:99986558	0	L	X:99986401:99986700	359.945	M	SYTL4	X:99986558	3	L	X:99986401:99986700	246.635	L
SYTL4	X:99986625	40	M	X:99986625	cg17224287	0.42491	M	SYTL4	X:99986625	0	L	X:99986625	cg17224287	0.04765	L	SYTL4	X:99986625	40	M	X:99986401:99986700	359.945	M	SYTL4	X:99986625	0	L	X:99986401:99986700	246.635	L
SYTL4	X:99987037	38	M	X:99987037	cg01537968	0.30456	M	SYTL4	X:99987037	6	L	X:99987037	cg01537968	0.0513	L	SYTL4	X:99987037	38	M	X:99987001:99987300	313.526	M	SYTL4	X:99987037	6	L	X:99987001:99987300	221.388	L
SYTL4	X:99987172	52	M	X:99987172	cg17041378	0.40335	M	SYTL4	X:99987172	12	L	X:99987172	cg17041378	0.13548	L	SYTL4	X:99987172	52	M	X:99987001:99987300	313.526	M	SYTL4	X:99987172	12	L	X:99987001:99987300	221.388	L
SYTL4	X:99987179	29	M	X:99987179	cg07198771	0.23355	M	SYTL4	X:99987179	15	L	X:99987179	cg07198771	0.20528	L	SYTL4	X:99987179	29	M	X:99987001:99987300	313.526	M	SYTL4	X:99987179	15	L	X:99987001:99987300	221.388	L
SYTL4	X:99987184	52	M	X:99987184	cg23722438	0.41547	M	SYTL4	X:99987184	15	L	X:99987184	cg23722438	0.21855	M	SYTL4	X:99987184	52	M	X:99987001:99987300	313.526	M	SYTL4	X:99987184	15	L	X:99987001:99987300	221.388	L
PLS3	X:114795485	0	L	X:114795485	cg16221059	0.08285	L	PLS3	X:114795485	2	L	X:114795485	cg16221059	0.06352	L	PLS3	X:114795485	0	L	X:114795301:114795600	306.664	M	PLS3	X:114795485	2	L	X:114795301:114795600	218.139	L
PLS3	X:114795604	16	L	X:114795604	cg08990057	0.14621	L	PLS3	X:114795604	0	L	X:114795604	cg08990057	0.04512	L	PLS3	X:114795604	16	L	X:114795601:114795900	308.177	M	PLS3	X:114795604	0	L	X:114795601:114795900	156.53	L
PLS3	X:114795918	4	L	X:114795918	cg27162304	0.04915	L	PLS3	X:114795918	3	L	X:114795918	cg27162304	0.03554	L	PLS3	X:114795918	4	L	X:114795901:114796200	264.799	L	PLS3	X:114795918	3	L	X:114795901:114796200	114.625	L
PLS3	X:114796029	3	L	X:114796029	cg21539234	0.14231	L	PLS3	X:114796029	0	L	X:114796029	cg21539234	0.03831	L	PLS3	X:114796029	3	L	X:114795901:114796200	264.799	L	PLS3	X:114796029	0	L	X:114795901:114796200	114.625	L
PLS3	X:114796308	9	L	X:114796308	cg16524492	0.13732	L	PLS3	X:114796308	0	L	X:114796308	cg16524492	0.0591	L	PLS3	X:114796308	9	L	X:114796201:114796500	254.828	L	PLS3	X:114796308	0	L	X:114796201:114796500	161.046	L
SOX3	X:139590116	47	M	X:139590116	cg09076540	0.36056	M	SOX3	X:139590116	17	L	X:139590116	cg09076540	0.24846	M	SOX3	X:139590116	47	M	X:139590001:139590300	325.931	M	SOX3	X:139590116	17	L	X:139590001:139590300	231.184	L
SOX3	X:139590253	8	L	X:139590253	cg14495054	0.13311	L	SOX3	X:139590253	1	L	X:139590253	cg14495054	0.15274	L	SOX3	X:139590253	8	L	X:139590001:139590300	325.931	M	SOX3	X:139590253	1	L	X:139590001:139590300	231.184	L
SOX3	X:139590383	56	M	X:139590383	cg06964654	0.35895	M	SOX3	X:139590383	8	L	X:139590383	cg06964654	0.1694	L	SOX3	X:139590383	56	M	X:139590301:139590600	343.401	M	SOX3	X:139590383	8	L	X:139590301:139590600	169.559	L
SOX3	X:139590479	57	M	X:139590479	cg07681653	0.52172	M	SOX3	X:139590479	9	L	X:139590479	cg07681653	0.20404	L	SOX3	X:139590479	57	M	X:139590301:139590600	343.401	M	SOX3	X:139590479	9	L	X:139590301:139590600	169.559	L
ABCD1/BCAP31	X:152988881	37	M	X:152988881	cg18244029	0.23004	M	ABCD1/BCAP31	X:152988881	1	L	X:152988881	cg18244029	0.07315	L	ABCD1/BCAP31	X:152988881	37	M	X:152988601:152988900	286.492	M	ABCD1/BCAP31	X:152988881	1	L	X:152988601:152988900	184.705	L
ABCD1/BCAP31	X:152989424	46	M	X:152989424	cg01910452	0.17758	L	ABCD1/BCAP31	X:152989424	0	L	X:152989424	cg01910452	0.03205	L	ABCD1/BCAP31	X:152989424	46	M	X:152989201:152989500	300.044	M	ABCD1/BCAP31	X:152989424	0	L	X:152989201:152989500	44.9587	L
L1CAM/U52112.12	X:153151054	15	L	X:153151054	cg12206646	0.31276	M	L1CAM/U52112.12	X:153151054	4	L	X:153151054	cg12206646	0.2701	M	L1CAM/U52112.12	X:153151054	15	L	X:153150901:153151200	246.784	L	L1CAM/U52112.12	X:153151054	4	L	X:153150901:153151200	163.881	L
L1CAM/U52112.12	X:153151235	3	L	X:153151235	cg12469471	0.04629	L	L1CAM/U52112.12	X:153151235	0	L	X:153151235	cg12469471	0.01337	L	L1CAM/U52112.12	X:153151235	3	L	X:153151201:153151500	204.807	L	L1CAM/U52112.12	X:153151235	0	L	X:153151201:153151500	148.221	L
L1CAM/U52112.12	X:153151929	53	M	X:153151929	cg00641092	0.35939	M	L1CAM/U52112.12	X:153151929	33	M	X:153151929	cg00641092	0.34045	M	L1CAM/U52112.12	X:153151929	53	M	X:153151801:153152100	225.798	L	L1CAM/U52112.12	X:153151929	33	M	X:153151801:153152100	115.207	L
L1CAM/U52112.12	X:153152165	57	M	X:153152165	cg01465073	0.45962	M	L1CAM/U52112.12	X:153152165	15	L	X:153152165	cg01465073	0.31059	M	L1CAM/U52112.12	X:153152165	57	M	X:153152101:153152400	296.73	M	L1CAM/U52112.12	X:153152165	15	L	X:153152101:153152400	234.984	L
ARHGAP4	X:153193523	0	L	X:153193523	cg13282942	0.23013	M	ARHGAP4	X:153193523	0	L	X:153193523	cg13282942	0.08359	L	ARHGAP4	X:153193523	0	L	X:153193501:153193800	220.976	L	ARHGAP4	X:153193523	0	L	X:153193501:153193800	0	L
ARHGAP4	X:153194020	0	L	X:153194020	cg17619403	0.11401	L	ARHGAP4	X:153194020	0	L	X:153194020	cg17619403	0.08726	L	ARHGAP4	X:153194020	0	L	X:153193801:153194100	256.609	L	ARHGAP4	X:153194020	0	L	X:153193801:153194100	67.7486	L
HCFC1/TMEM187	X:153236214	2	L	X:153236214	cg03968699	0.17785	L	HCFC1/TMEM187	X:153236214	0	L	X:153236214	cg03968699	0.05448	L	HCFC1/TMEM187	X:153236214	2	L	X:153236101:153236400	292.71	M	HCFC1/TMEM187	X:153236214	0	L	X:153236101:153236400	231.115	L
HCFC1/TMEM187	X:153236396	3	L	X:153236396	cg03250911	0.08867	L	HCFC1/TMEM187	X:153236396	1	L	X:153236396	cg03250911	0.0271	L	HCFC1/TMEM187	X:153236396	3	L	X:153236101:153236400	292.71	M	HCFC1/TMEM187	X:153236396	1	L	X:153236101:153236400	231.115	L
IRAK1	X:153284899	36	M	X:153284899	cg06334238	0.46149	M	IRAK1	X:153284899	0	L	X:153284899	cg06334238	0.02514	L	IRAK1	X:153284899	36	M	X:153284701:153285000	274.562	L	IRAK1	X:153284899	0	L	X:153284701:153285000	156.111	L
IRAK1	X:153284959	30	M	X:153284959	cg18998000	0.43694	M	IRAK1	X:153284959	1	L	X:153284959	cg18998000	0	L	IRAK1	X:153284959	30	M	X:153284701:153285000	274.562	L	IRAK1	X:153284959	1	L	X:153284701:153285000	156.111	L
PLXNA3 (F2)-XY ONLY								PLXNA3 (F2)-XY ONLY	X:153686199	0	L	X:153686199	cg18395382	0.00369	L	PLXNA3 (F2)-XY ONLY	X:153686199						PLXNA3 (F2)-XY ONLY	X:153686199	0	L	X:153686101:153686400	134.712	L
PLXNA3	X:153686222	3	L	X:153686222	cg26146690	0.24381	M	PLXNA3	X:153686222	0	L	X:153686222	cg26146690	0.0637	L	PLXNA3	X:153686222	3	L	X:153686101:153686400	249.523	L	PLXNA3	X:153686222	0	L	X:153686101:153686400	134.712	L
PLXNA3	X:153686720	4	L	X:153686720	cg09868337	0.21944	M	PLXNA3	X:153686720	6	L	X:153686720	cg09868337	0.01136	L	PLXNA3	X:153686720	4	L	X:153686701:153687000	189.184	L	PLXNA3	X:153686720	6	L	X:153686701:153687000	0	L
PLXNA3	X:153686926	23	M	X:153686926	cg07428182	0.2624	M	PLXNA3	X:153686926	0	L	X:153686926	cg07428182	0.04694	L	PLXNA3	X:153686926	23	M	X:153686701:153687000	189.184	L	PLXNA3	X:153686926	0	L	X:153686701:153687000	0	L
G6PD/IKBKG	X:153775683	45	M	X:153775683	cg01058588	0.28133	M	G6PD/IKBKG	X:153775683	0	L	X:153775683	cg01058588	0.00546	L	G6PD/IKBKG	X:153775683	45	M	X:153775501:153775800	280.617	M	G6PD/IKBKG	X:153775683	0	L	X:153775501:153775800	95.0797	L
G6PD/IKBKG	X:153775711	37	M	X:153775711	cg24156746	0.29236	M	G6PD/IKBKG	X:153775711	0	L	X:153775711	cg24156746	0.03189	L	G6PD/IKBKG	X:153775711	37	M	X:153775501:153775800	280.617	M	G6PD/IKBKG	X:153775711	0	L	X:153775501:153775800	95.0797	L
G6PD/IKBKG	X:153775792	5	L	X:153775792	cg20450662	0.15741	L	G6PD/IKBKG	X:153775792	0	L	X:153775792	cg20450662	0.08934	L	G6PD/IKBKG	X:153775792	5	L	X:153775501:153775800	280.617	M	G6PD/IKBKG	X:153775792	0	L	X:153775501:153775800	95.0797	L
G6PD/IKBKG	X:153775841	34	M	X:153775841	cg08560117	0.2632	M	G6PD/IKBKG	X:153775841	0	L	X:153775841	cg08560117	0.0406	L	G6PD/IKBKG	X:153775841	34	M	X:153775801:153776100	316.564	M	G6PD/IKBKG	X:153775841	0	L	X:153775801:153776100	75.6113	L
G6PD/IKBKG	X:153775847	28	M	X:153775847	cg14397289	0.22405	M	G6PD/IKBKG	X:153775847	0	L	X:153775847	cg14397289	0.03803	L	G6PD/IKBKG	X:153775847	28	M	X:153775801:153776100	316.564	M	G6PD/IKBKG	X:153775847	0	L	X:153775801:153776100	75.6113	L
G6PD/IKBKG	X:153775868	25	M	X:153775868	cg20077602	0.12554	L	G6PD/IKBKG	X:153775868	0	L	X:153775868	cg20077602	0.00861	L	G6PD/IKBKG	X:153775868	25	M	X:153775801:153776100	316.564	M	G6PD/IKBKG	X:153775868	0	L	X:153775801:153776100	75.6113	L
G6PD/IKBKG	X:153775885	47	M	X:153775885	cg00813156	0.41412	M	G6PD/IKBKG	X:153775885	0	L	X:153775885	cg00813156	0.01263	L	G6PD/IKBKG	X:153775885	47	M	X:153775801:153776100	316.564	M	G6PD/IKBKG	X:153775885	0	L	X:153775801:153776100	75.6113	L
G6PD/IKBKG	X:153775995	48	M	X:153775995	cg13550079	0.24786	M	G6PD/IKBKG	X:153775995	0	L	X:153775995	cg13550079	0.05691	L	G6PD/IKBKG	X:153775995	48	M	X:153775801:153776100	316.564	M	G6PD/IKBKG	X:153775995	0	L	X:153775801:153776100	75.6113	L
G6PD/IKBKG	X:153776001	39	M	X:153776001	cg18780751	0.26368	M	G6PD/IKBKG	X:153776001	0	L	X:153776001	cg18780751	0.06272	L	G6PD/IKBKG	X:153776001	39	M	X:153775801:153776100	316.564	M	G6PD/IKBKG	X:153776001	0	L	X:153775801:153776100	75.6113	L
G6PD/IKBKG	X:153776009	37	M	X:153776009	cg13014982	0.26372	M	G6PD/IKBKG	X:153776009	0	L	X:153776009	cg13014982	0.00679	L	G6PD/IKBKG	X:153776009	37	M	X:153775801:153776100	316.564	M	G6PD/IKBKG	X:153776009	0	L	X:153775801:153776100	75.6113	L
G6PD/IKBKG	X:153776107	37	M	X:153776107	cg08873063	0.34044	M	G6PD/IKBKG	X:153776107	0	L	X:153776107	cg08873063	0.04266	L	G6PD/IKBKG	X:153776107	37	M	X:153776101:153776400	358.848	M	G6PD/IKBKG	X:153776107	0	L	X:153776101:153776400	155.675	L
Key:
Gene: HUGO Gene Nomenclature Committee (HGNC) unique gene symbol. The CpG island assayed is located 5’ to gene. Two gene names indicate two genes share the island. “XY only” indicates that there are data for sample GM01247 only. “XX” only indicates that there are data for sample GM01240 only.
BS coordinate: The coordinate on the X chromosome (GRCh37) for the individual CpG.
BS % methylation: Percentage methylation of the CpG dinucleotide at that position determined by MethTools analysis of the bisulfite sequencing data.
BS methylation level: Level of methylation of the individual CpG dinucleotide classified as L/M/H with L=low, methylation level less than 20%; M=medium, methylation level greater than or equal to 20% and less than 70%; H=high, methylation level greater than or equal to 70%. Percentage methylation was calculated using MethTools.
450K coordinate: The coordinate on the X chromosome (GRCh37) of the individual probe from the HumanMethylation450 array used in the analysis.
450K probe name: Name of the individual probe from the HumanMethylation450 array supplied by Illumina.
450K average beta value: Average beta-value of each probe (scaled from 0 to 1) as calculated by Genome Studio representing the methylation level for each probe.
450K methylation level: Level of methylation of the individual CpG dinucleotide classified as L/M/H with L=low, average-beta value of less than 0.21; M=medium, average-beta value of greater than or equal to 0.21 and less than 0.57; H=high, average-beta-value of greater than or equal to 0.57.
MeDIP-seq windows cords: The coordinates on the X chromosome (GRCh37) of the window analysed by MEDIPS.
MEDIPS score: Score calculated by MEDIPS for each window.
MEDIPS methylation level: Level of methylation of the individual CpG dinucleotide classified as L/M/H with L=low, MEDIPS score of less than 280; M=medium, MEDIPS score of greater than or equal to 280 and less than 410; H=high, MEDIPS score of greater than or equal to 410.
